# Supplementary material
Source: PubMed Central journal article supplement (PMC4628589)
Supplement: NIHMS718260-supplement.pdf [file NIHMS718260-supplement.pdf]

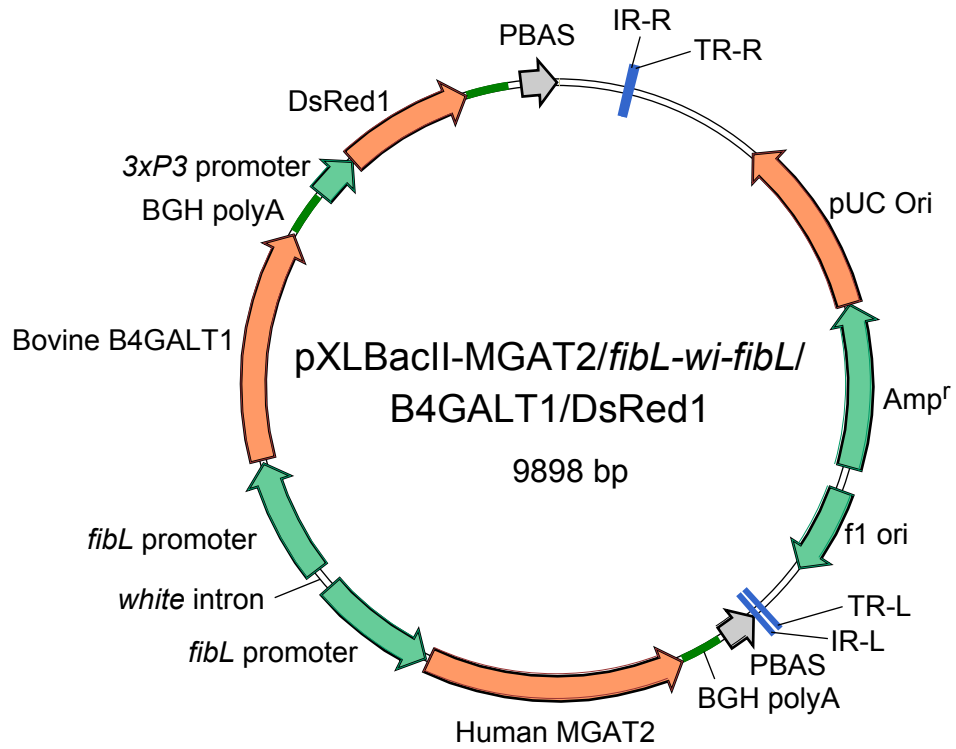

**Fig. S1.** *piggyBac* vector. This new dual *piggyBac* vector encodes both human MGAT2 and bovine B4GALT1 under the transcriptional control of the *Bombyx mori fibL* promoter, with each expression cassette separated by the *Drosophila white* intron 2 sequence. The vector also includes DsRed1 under the control of the neural-specific synthetic promoter, 3xP3, as an eye color marker. PBAS: *piggyBac* activation sequence, IR: inverted repeat, TR: terminal repeat.

## Supplementary Material and Methods

### 1. Splinkerette PCR

#### 1. Prepare Splinkerette adaptors

- (1) Two different Splinkerette adaptors were prepared. One adaptor has GATC overhang, and the other adaptor has CTAG overhang. For GATC overhang adaptor, 7.5 µg of Splink-GATC-top primer and 7.5 µg of Splink-bottom primer were mixed with Buffer2 (New England Biolabs). For CTAG overhang, 7.5 µg of Splink-CTAG-top primer and 7.5 µg of Splink-bottom primer were mixed with Buffer2 (New England Biolabs). Both DNA mixtures were heated at 90°C for 5 min and cooled down for 30 min at room temperature.

#### 2. Prepare Splinkerette PCR template

- (1) Posterior silk glands (PSGs) from 4<sup>th</sup> day of 5<sup>th</sup> instar of FlcGG silkworms were dissected out. Genomic DNA of PSGs was prepared using Wizard genomic DNA purification kit (Promega).
- (2) 1 µg of genomic DNA was digested with *Bam*HI, *Bgl*II, *Bst*YI, *Spe*I, or *Xba*I for 3 hours at 37°C except for *Bst*YI (*Bst*YI was used at 65°C for 3 hours). After digestion reactions, digested genomic DNA fragments were purified with DNA mini-spin columns (Omega Biotech).
- (3) The genomic DNA digested with *Bam*HI, *Bgl*II, or *Bst*YI was ligated to Splinkerette adaptor with GATC overhang, and the genomic DNA digested with *Spe*I or *Xba*I was ligated to Splinkerette adaptor with CTAG overhang using T4 DNA ligase (NEB). These DNA ligates were used for the template for 1<sup>st</sup> Splinkerette PCR.

#### 3. 1<sup>st</sup> Splinkerette PCR

- (1) 1<sup>st</sup> Splinkerette PCR template was mixed with Splink1 primer and PB\_L-1 primer for left side of *piggyBac*, or PB\_R-1 for right side of *piggyBac*, and Phusion *Taq* polymerase (New England Biolabs) was used for PCR.
- (2) PCR was performed with 2 cycles of 98°C for 20 sec and 64°C for 15 sec, and 30 cycles of 98°C for 20 sec, 66°C for 15 sec, and 72°C for 2 min after the initial 1 min heating at 98°C.
- (3) The 1<sup>st</sup> Splinkerette PCR products were diluted at 1/50 with distilled water and used for the templates for 2<sup>nd</sup> Splinkerette PCR.

#### 4. 2<sup>nd</sup> Splinkerette PCR

- (1) 2<sup>nd</sup> Splinkerette PCR template was mixed with Splink2 primer and PB\_L-2 primer for left side of *piggyBac*, or PB\_R-2 for right side of *piggyBac*.
- (2) PCR was performed with 30 cycles of 98°C for 20 sec, 66°C for 15 sec, 72°C for 2 min after 1 min of 98°C incubation.

#### 5. Determine the sequences of Splinkerette PCR products

- (1) The 2<sup>nd</sup> Splinkerette PCR products were separated in 1% of agarose gel and purified with Agarose gel extraction kit (Omega Biotech).
- (2) dATP was added to the both ends of PCR products with the mixture of dNTP and *Taq* polymerase (New England Biolabs).
- (3) The PCR products were ligated to pGEM-T vector (Promega).
- (4) DH5α competent *E. coli* were transformed with the DNA ligates.
- (5) The positive clones for each PCR product were isolated by *Nde*I and *Sac*II digestion.
- (6) The insert DNAs were sequenced using T7 promoter primer and SP6 primer.

#### 6. Map the localization of *piggyBac* insertion sites in silkworm genome

(1) According to the sequencing results, the *piggyBac* insertion sites were determined by BLAST search at SilkDB: <http://silkworm.genomics.org.cn/>, and KAIKObase: <http://sgp.dna.affrc.go.jp/KAIKObase/>.

#### 7. Sequences of primers used for Splinkerette PCR

| Primer name     | Sequence from 5' to 3'                                        |
|-----------------|---------------------------------------------------------------|
| Splink-GATC-top | gatccactagtgctgacaccagtctctaatttttttcaaaaaa                   |
| Splink-CTAG-top | ctagccactagtgctgacaccagtctctaatttttttcaaaaaa                  |
| Splink-bottom   | cgaagagtaaccgttgctaggagagaccgtggctgaatgagactggtgctgacactagtgg |
| Splink1         | cgaagagtaaccgttgctaggagagacc                                  |
| PB_L-1          | cgtcaattttacgcatgattatctttaacg                                |
| PB_R-1          | cgtacgtcacaatatgattatcttctaggg                                |
| Splink2         | gtggctgaatgagactggtgctgac                                     |
| PB_L-2          | gactgagatgtcctaaatgcacagcg                                    |
| PB_R-2          | gagcaatattcaagaatgcatgcgctc                                   |
